# Supplementary material for: Synthesis and structural characterization of novel cyclam-based zirconium complexes and their use in the controlled ROP of rac-lactide: access to cyclam-functionalized polylactide materials
Source: Royal Society of Chemistry journal article supplement (doi:10.1039/c2dt31133j), 2012-01-01
Supplement: c2dt31133j.pdf [file c2dt31133j.pdf]

## Supporting Information

For

### **Synthesis and Structural Characterization of Novel Cyclam-based Zirconium Complexes and Their Use in the Controlled ROP of *rac*-lactide: Access to Cyclam- functionalized Polylactide Material**

Luis G. Alves,<sup>a</sup> Frédéric Hild,<sup>b</sup> Rui F. Munhá,<sup>a</sup> Luis F. Veiros,<sup>a</sup> Samuel Dagorne<sup>b\*</sup> and Ana  
M. Martins<sup>a\*</sup>

<sup>a</sup> Centro de Química Estrutural, Instituto Superior Técnico, Universidade Técnica de Lisboa,  
Av. Rovisco Pais 1, 1049-001 Lisboa, Portugal

<sup>b</sup> Laboratoire DECOMET, Institut de Chimie de Strasbourg (CNRS-Université de  
Strasbourg), 1 rue Blaise Pascal, 67000 Strasbourg, France.

email: [ana.martins@ist.utl.pt](mailto:ana.martins@ist.utl.pt), [dagorne@unistra.fr](mailto:dagorne@unistra.fr)

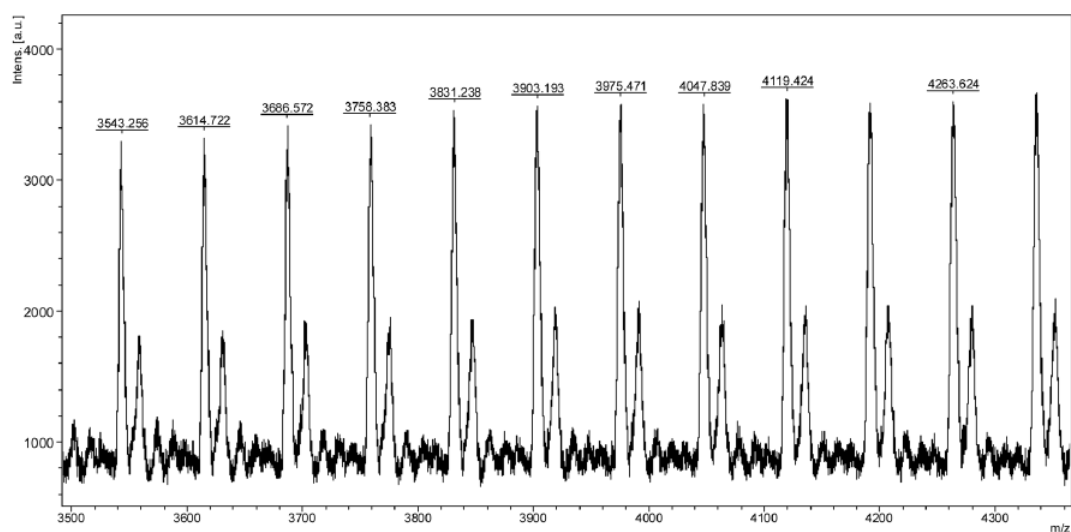

**Figure S1.** Zoom-in of the MALDI-TOF spectrum of the O'Pr-end PLA prepared by ROP of *rac*-lactide initiated by complex **2**. Conditions: 100 equiv. *rac*-lactide,  $[\text{monomer}]_0 = 1 \text{ M}$ ,  $\text{CH}_2\text{Cl}_2$ , room temperature, polymer isolated at 95% conversion to PLA.

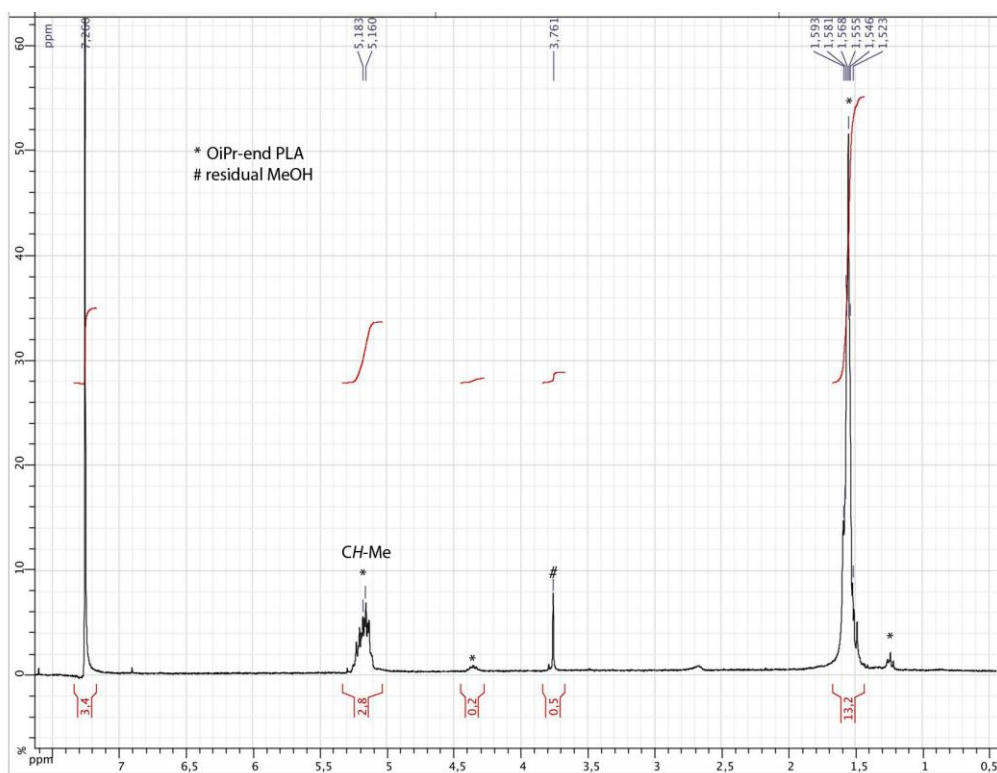

**Figure S2.**  $^1\text{H}$  NMR spectrum of O'Pr-end PLA prepared by ROP of *rac*-lactide initiated by complex **2**. Conditions: 100 equiv. *rac*-lactide,  $[\text{monomer}]_0 = 1 \text{ M}$ ,  $\text{CH}_2\text{Cl}_2$ , room temperature, polymer isolated at 95% conversion to PLA.

==== Shimadzu LCsolution GPC Analysis Report ====

Acquired by : Admin  
 Sample Name : HF270  
 Sample ID :  
 Vail# :  
 Injection Volume : 100 uL  
 Data Filename : HF270.lcd  
 Method Filename : gpc\_30\_juin2011.lcm  
 Batch Filename :  
 Report Filename : Report\_template.lcr  
 Date Acquired : 05/10/2011 11:36:50  
 Data Processed : 05/10/2011 11:58:33

Chromatogram & Calibration Curve

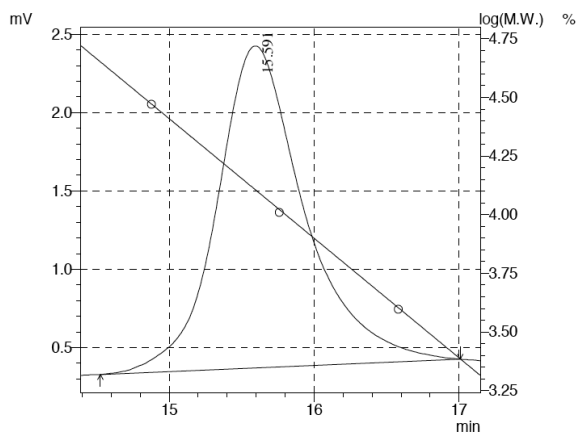

Molecular Weight Distribution Curve

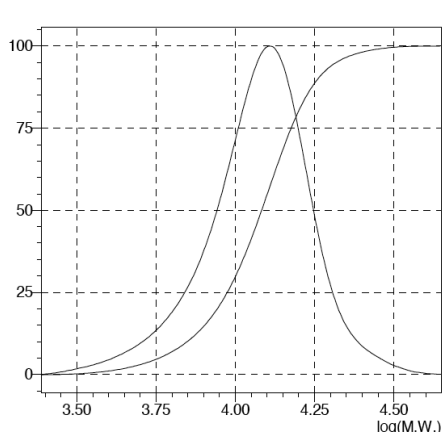

GPC Calculation Results

Peak#:1 (Detector A Ch1)

[Peak Information]

|       | Time(min) | Volume(mL) | Molecular Weight | Height |
|-------|-----------|------------|------------------|--------|
| Start | 14.525    | 14.525     | 44824            | 328    |
| Top   | 15.591    | 15.591     | 12828            | 2055   |
| End   | 17.008    | 17.008     | 2430             | 427    |

Area : 86325

Area% : 100.0000

[Average Molecular Weight]

|                                     |         |
|-------------------------------------|---------|
| Number Average Molecular Weight(Mn) | 10827   |
| Weight Average Molecular Weight(Mw) | 12605   |
| Z Average Molecular Weight(Mz)      | 14391   |
| Z+1 Average Molecular Weight(Mz1)   | 16337   |
| Mw/Mn                               | 1.16420 |
| Mv/Mn                               | 1.14234 |
| Mz/Mw                               | 1.14169 |

Detector A Ch1

[Average Molecular Weight(Total)]

|                                     |         |
|-------------------------------------|---------|
| Number Average Molecular Weight(Mn) | 10827   |
| Weight Average Molecular Weight(Mw) | 12605   |
| Z Average Molecular Weight(Mz)      | 14391   |
| Z+1 Average Molecular Weight(Mz1)   | 16337   |
| Mw/Mn                               | 1.16420 |
| Mv/Mn                               | 1.14234 |
| Mz/Mw                               | 1.14169 |

**Figure S3.** SEC traces of isolated cyclam-functionalized PLA prepared via ROP of *rac*-lactide by complex **4**. Conditions: 100 equiv. of *rac*-lactide, 80 °C, toluene, quantitative conversion, 17h.

D:\data\Melanie\Service de spectrometrie de masse\20111007\B6433ML HF268\0\_K81

Comment 1  
Comment 2

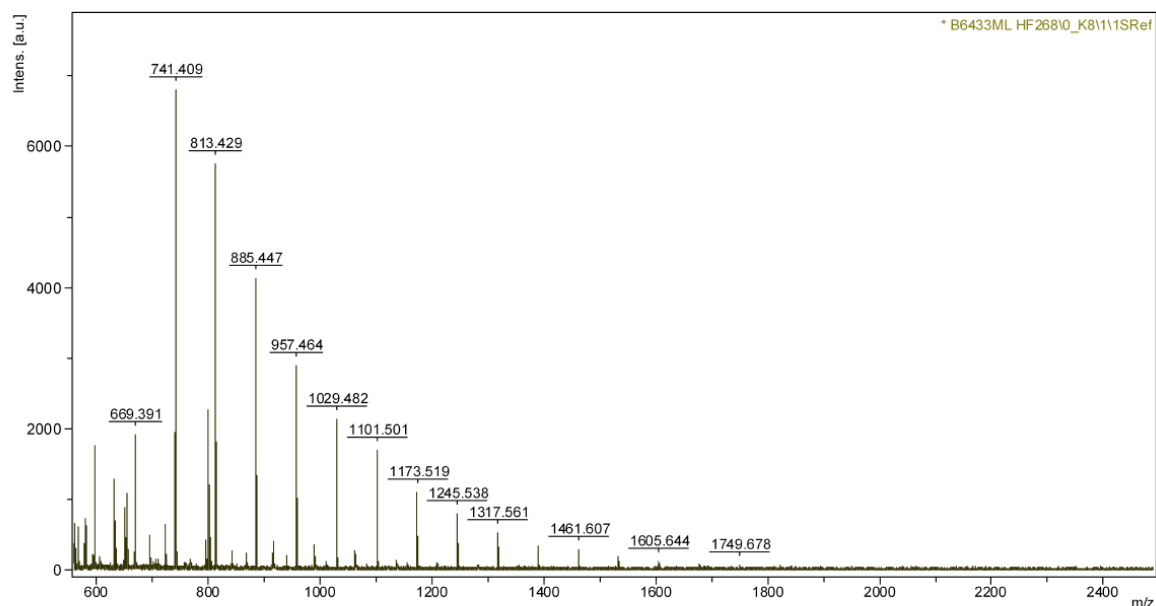

**Figure S4.** MALDI-TOF spectrum of the cyclam-functionalized PLA prepared by ROP of *rac*-lactide initiated by complex **3**. Conditions: 20 equiv. *rac*-lactide,  $[\text{monomer}]_0 = 1 \text{ M}$ , toluene, 80 °C, polymer isolated after quantitative conversion of LA to PLA.

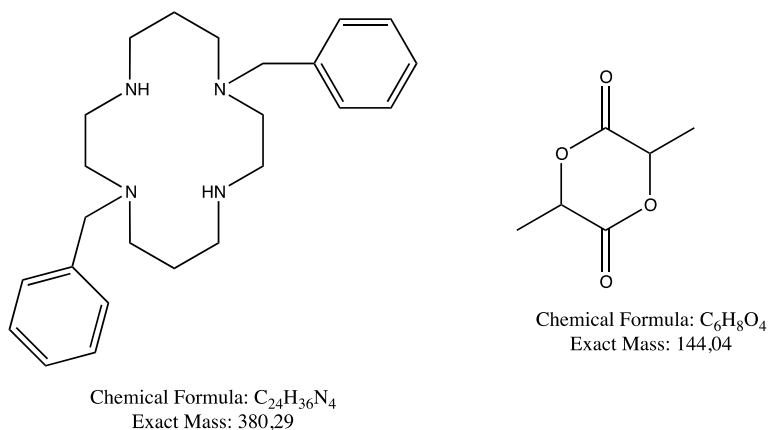

The above MALDI-TOF spectrum features peaks consistent with  $[\text{M}+\text{H}]^+$  cations exactly corresponding to a cyclam-PLA polymer.

For instance:

- The peak at 813.429 matches that expected for a cyclam-PLA oligomer with three lactide units:  $380.29 + (3 \times 144.04) + 1.008 = 813.418$
- The peak at 1245.538 matches exactly that expected for a cyclam-PLA oligomer with six lactide units:  $380.29 + (6 \times 144.04) + 1.008 = 1245.538$

D:\data\Melanie\Service de spectrometrie de masse\20111007\B6434ML HF270\0\_K9\1

Comment 1  
Comment 2

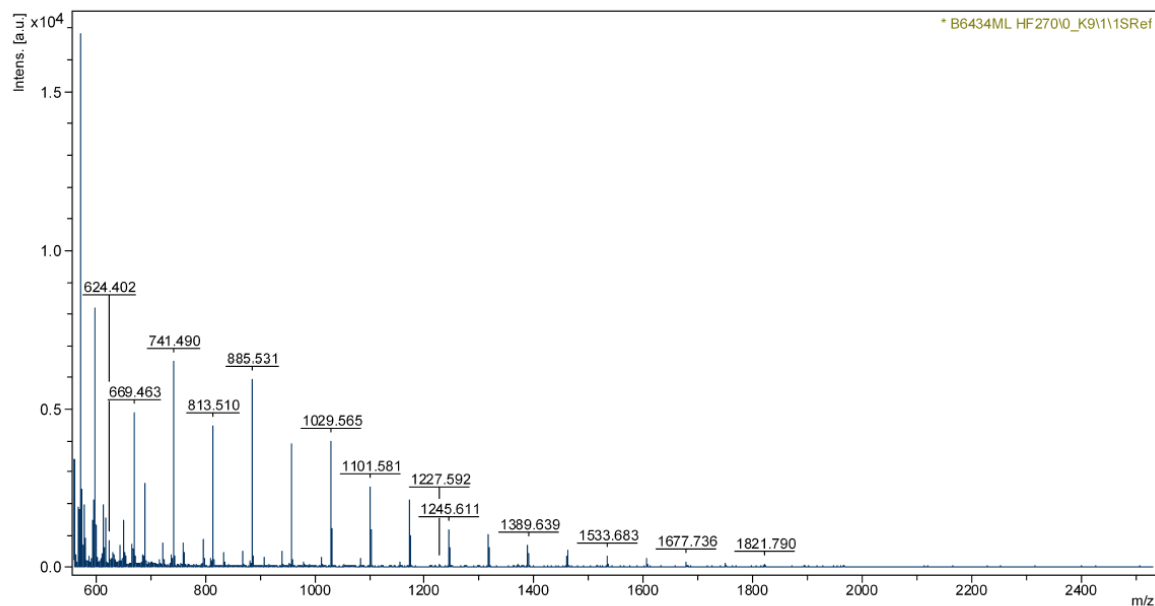

**Figure S5.** MALDI-TOF spectrum of the cyclam-functionalized PLA prepared by ROP of *rac*-lactide initiated by complex **4**. Conditions: 20 equiv. *rac*-lactide, [monomer]<sub>0</sub> = 1 M, toluene, 80 °C, polymer isolated after quantitative conversion of LA to PLA.

The above MALDI-TOF spectrum is nearly identical to that in figure S3 and is thus consistent with a cyclam-functionalized PLA.

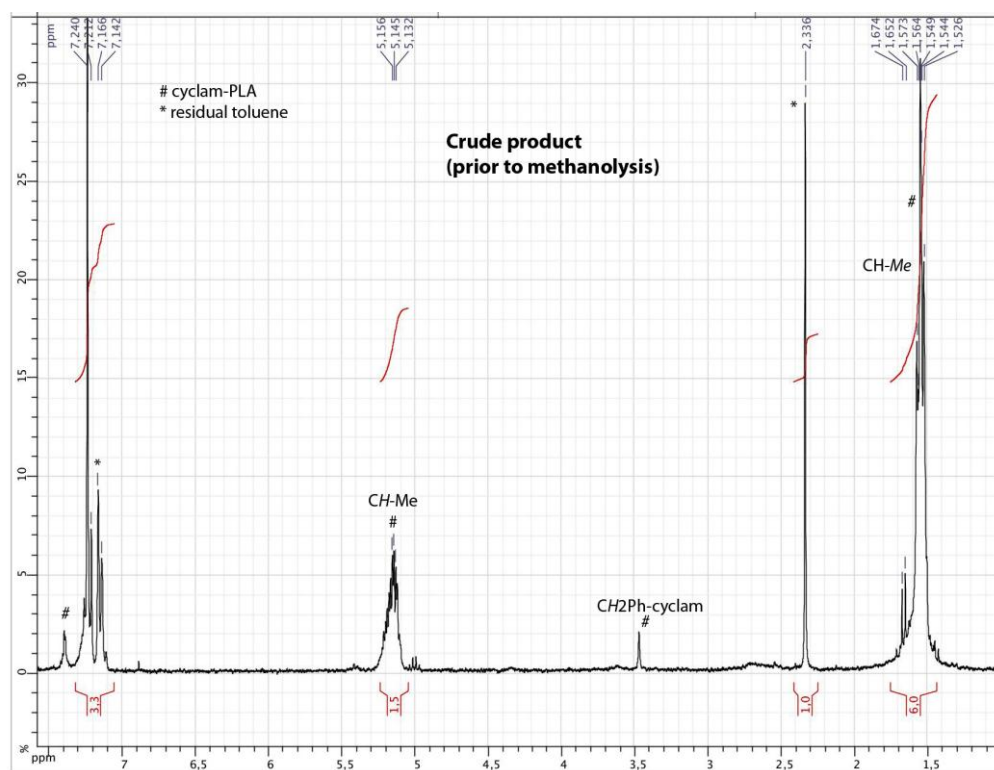

**Figure S6.** <sup>1</sup>H NMR spectrum of the cyclam-functionalized PLA prepared by ROP of *rac*-lactide initiated by complex **4**. Conditions: 20 equiv. *rac*-lactide, [monomer]<sub>0</sub> = 1 M, toluene, 80 °C, crude polymerization product.

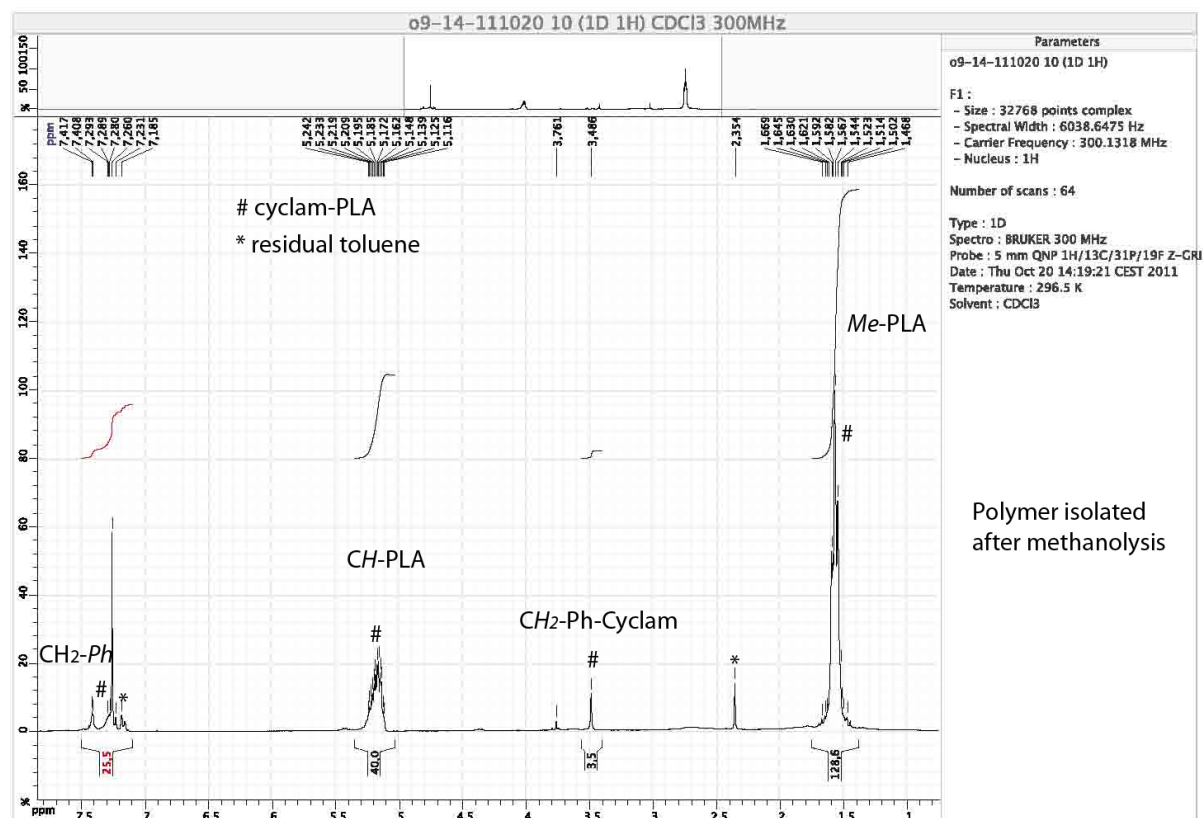

**Figure S7.**  $^1\text{H}$  NMR spectrum of the cyclam-functionalized PLA prepared by ROP of *rac*-lactide initiated by complex **4**. Conditions: 20 equiv. *rac*-lactide,  $[\text{monomer}]_0 = 1 \text{ M}$ , toluene,  $80^\circ\text{C}$ , polymer after methanolysis.

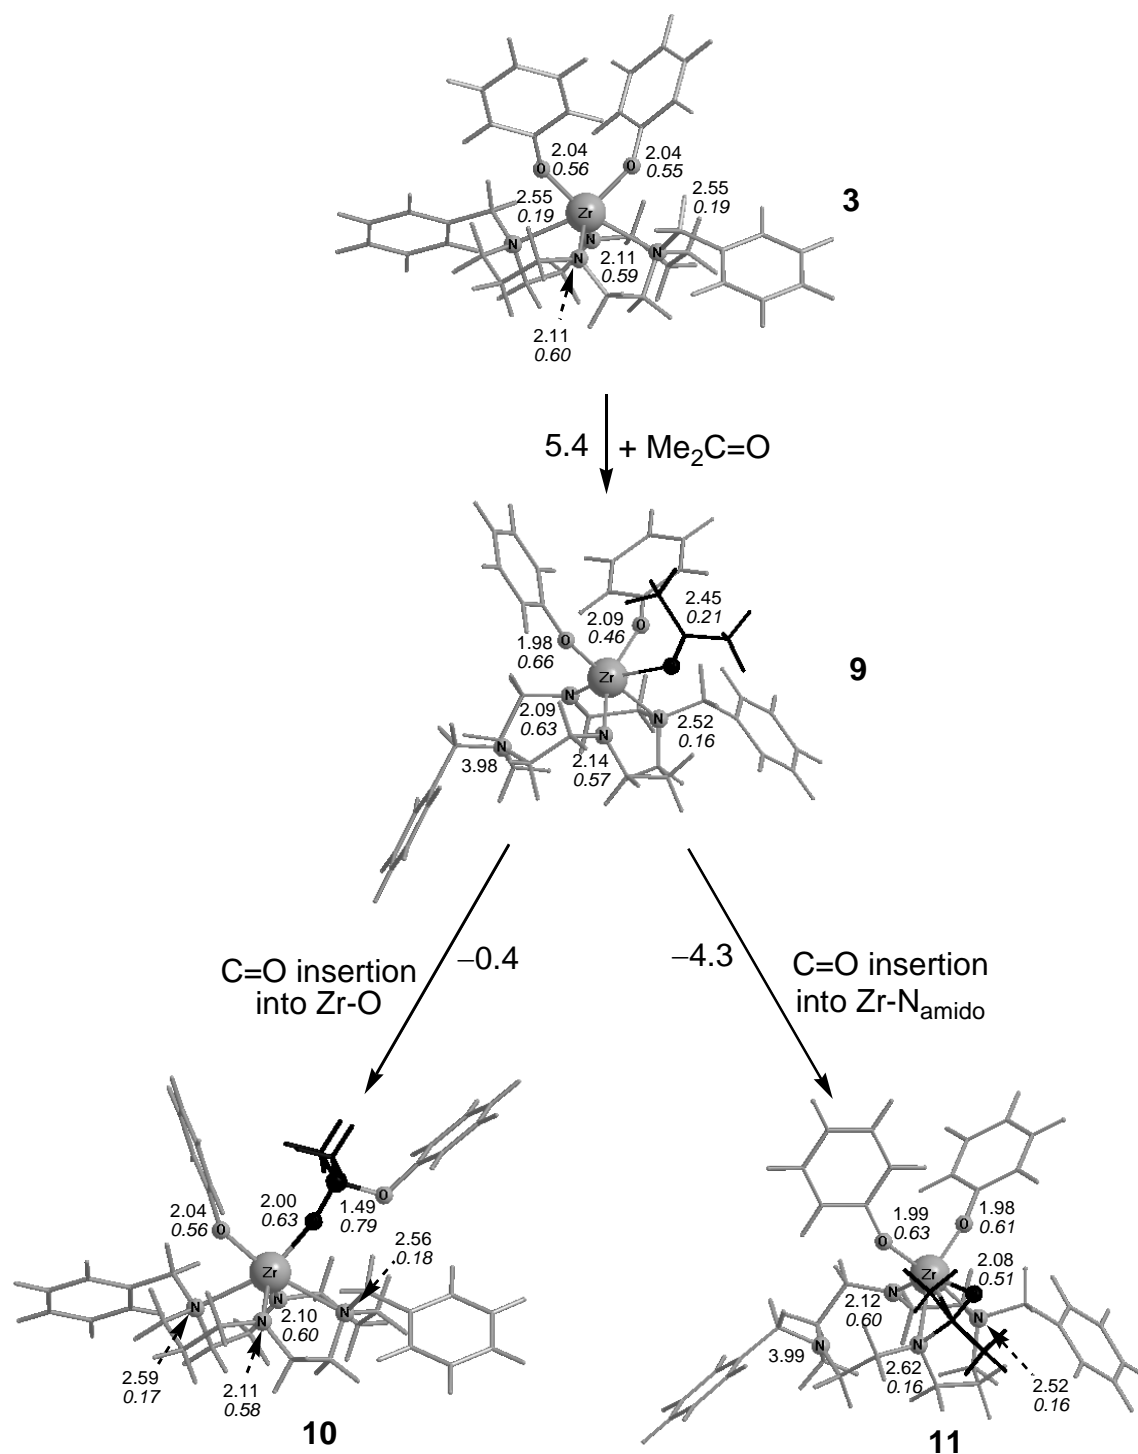

**Figure S8.** Energy balance (kcal/mol) for the addition of acetone to **3**, and for C=O insertion into a Zr-O bond (bottom left) and into a Zr-N<sub>amido</sub> bond (bottom right) of that complex. The geometry optimised for the various species is represented with the more relevant distances (Å) and Wiberg indices (italics). The acetone moiety is darkened.



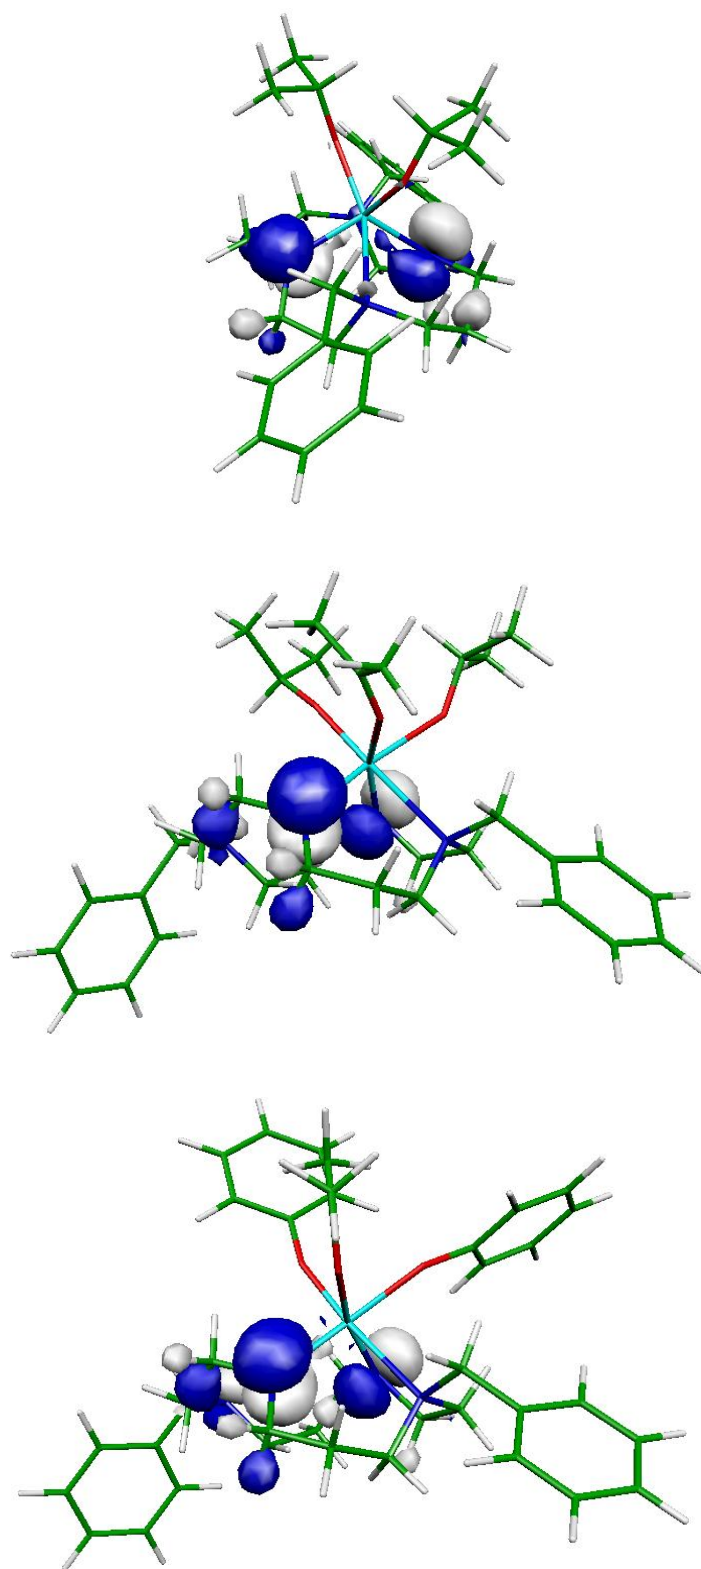

**Figure S9.** Representation of the HOMO of complexes **2** (top), **6** (centre) and **9** (bottom).

Atomic Coordinates for all the optimized molecules (B3LYP/b1)

2

|    |           |           |           |
|----|-----------|-----------|-----------|
| Zr | -0.499679 | -0.241283 | -0.005560 |
| N  | -0.965834 | -1.608977 | 2.153376  |
| N  | 0.365732  | -1.173033 | -2.263618 |
| O  | -1.051907 | 1.142550  | -1.356374 |
| O  | -0.417942 | 1.120711  | 1.469641  |
| C  | -2.697812 | -1.649924 | 4.064718  |
| C  | 1.425860  | -0.112375 | -5.372029 |
| H  | 0.468914  | 0.402845  | -5.391447 |
| C  | -3.656944 | -2.672211 | 3.999933  |
| H  | -4.032915 | -2.990991 | 3.031437  |
| C  | -0.703623 | -1.494880 | -3.248158 |
| H  | -0.253784 | -1.975277 | -4.129322 |
| H  | -1.109575 | -0.531872 | -3.574184 |
| C  | -2.265634 | -1.231685 | 5.332727  |
| H  | -1.543584 | -0.422633 | 5.408053  |
| N  | -2.033255 | -1.667020 | -0.352724 |
| C  | 1.281138  | -0.128138 | -2.835115 |
| H  | 2.013660  | 0.103299  | -2.058476 |
| H  | 0.659928  | 0.759902  | -2.962272 |
| C  | 1.549464  | -2.020372 | 2.568819  |
| H  | 2.220082  | -2.048771 | 3.439594  |
| H  | 1.554836  | -3.036871 | 2.156380  |
| C  | 0.165875  | -1.648763 | 3.120276  |
| H  | -0.081955 | -2.335953 | 3.942589  |
| H  | 0.230951  | -0.642706 | 3.547003  |
| N  | 1.425887  | -1.100045 | 0.240565  |
| C  | -2.165006 | -0.983025 | 2.806300  |
| H  | -1.871970 | 0.046094  | 3.020217  |
| H  | -2.948701 | -0.940682 | 2.046435  |
| C  | 1.991915  | -0.463517 | -4.136639 |
| C  | 3.244705  | -1.095547 | -4.142444 |
| H  | 3.719862  | -1.347585 | -3.198166 |
| C  | -2.290971 | -2.839672 | 0.461918  |
| H  | -2.225823 | -3.776039 | -0.121086 |
| H  | -3.322026 | -2.826312 | 0.866191  |
| C  | -2.755873 | -1.827177 | 6.495437  |
| H  | -2.407722 | -1.484444 | 7.465920  |
| C  | -1.718738 | 2.373622  | -1.528698 |
| H  | -1.108372 | 3.172564  | -1.075224 |
| C  | -3.698045 | -2.854035 | 6.411966  |
| H  | -4.083710 | -3.317330 | 7.315665  |
| C  | -1.873035 | -2.360130 | -2.758804 |
| H  | -1.530904 | -3.353768 | -2.444169 |
| H  | -2.508293 | -2.529367 | -3.640015 |
| C  | 2.048447  | -2.041773 | -0.669972 |
| H  | 2.307999  | -2.994395 | -0.173861 |
| H  | 3.009465  | -1.649774 | -1.056295 |
| C  | -2.719198 | -1.720821 | -1.642486 |
| H  | -2.996022 | -0.707394 | -1.958069 |
| H  | -3.663521 | -2.281932 | -1.547497 |
| C  | 2.075931  | -0.401164 | -6.572376 |
| H  | 1.618668  | -0.116948 | -7.516109 |
| C  | -0.184160 | 2.477517  | 1.775609  |
| H  | -1.031793 | 3.075257  | 1.400399  |
| C  | 1.101853  | -2.377574 | -1.824210 |
| H  | 1.645952  | -2.847253 | -2.658030 |
| H  | 0.356630  | -3.092424 | -1.469415 |
| C  | 2.109619  | -1.032297 | 1.530272  |
| H  | 2.027437  | -0.018554 | 1.940661  |
| H  | 3.187332  | -1.225639 | 1.400096  |
| C  | -1.270195 | -2.944369 | 1.596951  |
| H  | -1.618983 | -3.638533 | 2.376958  |
| H  | -0.336107 | -3.342481 | 1.194924  |
| C  | 3.314989  | -1.044418 | -6.560062 |
| H  | 3.824886  | -1.267323 | -7.492999 |
| C  | -3.084858 | 2.371075  | -0.830896 |
| H  | -3.734725 | 1.603484  | -1.266124 |
| H  | -3.583850 | 3.341553  | -0.935364 |
| H  | -2.970814 | 2.157267  | 0.236249  |
| C  | -4.150598 | -3.272241 | 5.159642  |
| H  | -4.894691 | -4.060427 | 5.084624  |
| C  | 3.899845  | -1.387207 | -5.340116 |

|   |           |           |           |
|---|-----------|-----------|-----------|
| H | 4.870817  | -1.874358 | -5.319271 |
| C | -1.856731 | 2.685508  | -3.023552 |
| H | -0.874158 | 2.704525  | -3.505585 |
| H | -2.332486 | 3.659852  | -3.182707 |
| H | -2.467695 | 1.921247  | -3.517461 |
| C | -0.120828 | 2.664612  | 3.296236  |
| H | -1.043977 | 2.311240  | 3.766513  |
| H | 0.012835  | 3.719834  | 3.560237  |
| H | 0.718226  | 2.097769  | 3.715837  |
| C | 1.091989  | 2.991152  | 1.096593  |
| H | 1.965759  | 2.436167  | 1.456244  |
| H | 1.251121  | 4.055026  | 1.307607  |
| H | 1.028912  | 2.862534  | 0.011667  |

3

|    |           |           |           |
|----|-----------|-----------|-----------|
| Zr | 0.037984  | 0.198871  | 0.908799  |
| N  | 1.774321  | 1.894110  | 1.698822  |
| O  | -1.506278 | -1.035537 | 1.390892  |
| N  | 0.363399  | -1.821656 | -0.614553 |
| C  | -0.903976 | -3.020304 | -2.517806 |
| C  | 1.854945  | 3.131778  | 0.868902  |
| H  | 2.695197  | 3.745989  | 1.221711  |
| H  | 0.935566  | 3.690038  | 1.071985  |
| N  | 0.681864  | 0.835827  | -0.998129 |
| C  | -0.881379 | -1.932603 | -1.456011 |
| H  | -1.032771 | -0.955121 | -1.919684 |
| H  | -1.698674 | -2.081497 | -0.748069 |
| C  | 3.433888  | 2.724770  | 4.592498  |
| H  | 3.606778  | 1.653671  | 4.653404  |
| C  | 2.347656  | 3.207501  | 3.847111  |
| O  | -1.054656 | 1.862911  | 1.364273  |
| C  | 0.596058  | -3.111016 | 0.099385  |
| H  | 0.830081  | -3.891239 | -0.638210 |
| H  | -0.359878 | -3.375538 | 0.561872  |
| C  | 1.540662  | -1.415192 | -1.416275 |
| H  | 2.398429  | -1.414586 | -0.740303 |
| H  | 1.747313  | -2.136117 | -2.220722 |
| C  | 1.409713  | 2.263123  | 3.113003  |
| H  | 1.313495  | 1.326574  | 3.667560  |
| H  | 0.412811  | 2.702119  | 3.049039  |
| C  | -2.471339 | -1.332191 | 2.284187  |
| C  | 1.350901  | -0.003532 | -1.974653 |
| H  | 2.350657  | 0.382175  | -2.242342 |
| H  | 0.788606  | -0.031211 | -2.927041 |
| C  | 1.670652  | -3.124131 | 1.195013  |
| H  | 2.663587  | -2.902491 | 0.784614  |
| H  | 1.719619  | -4.162236 | 1.552359  |
| N  | 1.514593  | -0.776068 | 2.048392  |
| C  | -0.433427 | -2.780489 | -3.817757 |
| H  | -0.051627 | -1.796218 | -4.075306 |
| C  | 2.969316  | 5.469313  | 4.508734  |
| H  | 2.774627  | 6.537752  | 4.481254  |
| C  | 2.123865  | 4.592883  | 3.827723  |
| H  | 1.270892  | 4.986915  | 3.281256  |
| C  | 4.283505  | 3.597103  | 5.274904  |
| H  | 5.116935  | 3.200480  | 5.847963  |
| C  | -2.868535 | -0.416256 | 3.276136  |
| H  | -2.398974 | 0.561331  | 3.305957  |
| C  | -2.904072 | 2.389236  | -0.073095 |
| H  | -2.532451 | 1.688683  | -0.815977 |
| C  | -0.467183 | -3.779227 | -4.792417 |
| H  | -0.099469 | -3.569306 | -5.792928 |
| C  | -2.189553 | 2.545999  | 1.129911  |
| C  | -1.471050 | -5.289874 | -3.202409 |
| H  | -1.888651 | -6.262600 | -2.958188 |
| C  | 4.056100  | 4.973381  | 5.231193  |
| H  | 4.713780  | 5.653364  | 5.765028  |
| C  | -3.102311 | -2.588581 | 2.233346  |
| H  | -2.801003 | -3.294542 | 1.466671  |
| C  | -0.982147 | -5.039567 | -4.485855 |
| H  | -1.012787 | -5.816997 | -5.243845 |
| C  | -1.434260 | -4.287922 | -2.232196 |

|   |           |           |           |
|---|-----------|-----------|-----------|
| H | -1.832694 | -4.488147 | -1.240894 |
| C | 0.772902  | 2.262333  | -1.311539 |
| H | -0.142836 | 2.773036  | -0.990156 |
| H | 0.835061  | 2.404249  | -2.402118 |
| C | -2.673040 | 3.456226  | 2.087972  |
| H | -2.124975 | 3.576636  | 3.018216  |
| C | 1.376187  | -2.193829 | 2.383777  |
| H | 0.358573  | -2.393775 | 2.740908  |
| H | 2.050016  | -2.451301 | 3.216013  |
| C | 2.838142  | -0.251086 | 2.327514  |
| H | 3.638063  | -0.919978 | 1.963547  |
| H | 3.009364  | -0.162878 | 3.416902  |
| C | 1.977538  | 2.952689  | -0.650129 |
| H | 2.902843  | 2.427554  | -0.917211 |
| H | 2.080908  | 3.966489  | -1.061684 |
| C | 3.024672  | 1.102093  | 1.638298  |
| H | 3.871885  | 1.654163  | 2.070812  |
| H | 3.242675  | 0.933390  | 0.581498  |
| C | -3.838854 | 4.181639  | 1.847634  |
| H | -4.198586 | 4.876923  | 2.601927  |
| C | -4.487328 | -2.007975 | 4.135803  |
| H | -5.263957 | -2.267013 | 4.849186  |
| C | -4.067458 | 3.122309  | -0.303452 |
| H | -4.606020 | 2.986237  | -1.237861 |
| C | -4.544258 | 4.022582  | 0.652258  |
| H | -5.451820 | 4.589868  | 0.469347  |
| C | -3.866574 | -0.757181 | 4.187521  |
| H | -4.163868 | -0.034927 | 4.943570  |
| C | -4.097896 | -2.919074 | 3.151725  |
| H | -4.573009 | -3.895302 | 3.095489  |

## 5

|    |           |           |           |
|----|-----------|-----------|-----------|
| Zr | -0.569578 | -0.228998 | -0.189753 |
| Cl | -2.544649 | 0.301404  | -1.681578 |
| N  | -2.450121 | -0.078392 | 1.545505  |
| O  | 0.205917  | -1.169115 | -1.751895 |
| N  | 1.933141  | 0.102485  | 0.159837  |
| C  | 3.914791  | 1.214394  | -1.065600 |
| C  | 2.699524  | -1.160762 | 0.364780  |
| H  | 3.745064  | -0.913672 | 0.595893  |
| H  | 2.690978  | -1.674869 | -0.601630 |
| N  | -0.286893 | -1.710028 | 1.262636  |
| N  | -0.196048 | 1.730642  | 0.502572  |
| C  | -3.122850 | 1.252406  | 1.649359  |
| H  | -3.818578 | 1.233607  | 2.499630  |
| H  | -3.717494 | 1.359539  | 0.737238  |
| C  | -4.507361 | -2.228661 | 3.289720  |
| H  | -3.597265 | -2.809886 | 3.411340  |
| C  | 1.013502  | 2.160538  | 1.176847  |
| H  | 0.808129  | 2.571934  | 2.181289  |
| H  | 1.508597  | 2.982217  | 0.625791  |
| C  | -3.477633 | -1.136805 | 1.227655  |
| H  | -2.931235 | -2.074946 | 1.102559  |
| H  | -3.884404 | -0.869324 | 0.251020  |
| C  | -6.876548 | -0.804769 | 2.958050  |
| H  | -7.802570 | -0.255126 | 2.814534  |
| C  | 5.667628  | 2.842058  | -0.596905 |
| H  | 5.959062  | 3.818521  | -0.220223 |
| C  | 2.450248  | 0.806208  | -1.067710 |
| H  | 1.815563  | 1.682524  | -1.216113 |
| H  | 2.252469  | 0.124928  | -1.896033 |
| C  | -0.853096 | -1.664291 | 2.599598  |
| H  | -0.075636 | -1.655470 | 3.383929  |
| H  | -1.453475 | -2.571001 | 2.797352  |
| C  | -2.217992 | 2.485806  | 1.779044  |
| H  | -2.898077 | 3.344123  | 1.871245  |
| H  | -1.641582 | 2.461987  | 2.712321  |
| C  | 2.174192  | -2.136688 | 1.425815  |
| H  | 2.190358  | -1.687048 | 2.426072  |
| H  | 2.898154  | -2.962793 | 1.459322  |
| C  | 6.632616  | 1.970254  | -1.103235 |
| H  | 7.678957  | 2.261511  | -1.118303 |
| C  | -4.611983 | -1.324584 | 2.222020  |
| C  | 4.323126  | 2.466974  | -0.582842 |
| H  | 3.578860  | 3.163627  | -0.206706 |
| C  | -1.697111 | -0.401406 | 2.781579  |

|   |           |           |           |
|---|-----------|-----------|-----------|
| H | -2.371279 | -0.501115 | 3.644717  |
| H | -1.032007 | 0.441798  | 2.976319  |
| C | -5.819295 | -0.625867 | 2.065352  |
| H | -5.935126 | 0.055297  | 1.226438  |
| C | 6.241897  | 0.727020  | -1.603889 |
| H | 6.983172  | 0.047706  | -2.015402 |
| C | 4.896479  | 0.357631  | -1.587229 |
| H | 4.600374  | -0.604905 | -1.996162 |
| C | 1.967776  | 0.977507  | 1.353724  |
| H | 2.989825  | 1.321014  | 1.570549  |
| H | 1.632587  | 0.375535  | 2.201159  |
| C | -6.749092 | -1.695896 | 4.025189  |
| H | -7.572565 | -1.839702 | 4.718826  |
| C | 0.776599  | -2.704767 | 1.126151  |
| H | 0.773547  | -3.103829 | 0.105487  |
| H | 0.583109  | -3.556806 | 1.796959  |
| C | -5.561863 | -2.411586 | 4.186013  |
| H | -5.458628 | -3.119706 | 5.003503  |
| C | -1.276338 | -1.717217 | 0.584858  |
| H | -1.868195 | 2.695506  | -0.337133 |
| H | -0.852159 | 3.731238  | 0.656316  |
| C | -0.085855 | -1.764954 | -3.004658 |
| H | -1.082427 | -1.419093 | -3.317114 |
| C | 0.934401  | -1.311410 | -4.051726 |
| H | 0.939779  | -0.220309 | -4.133530 |
| H | 0.691974  | -1.725463 | -5.036752 |
| H | 1.943428  | -1.645732 | -3.781757 |
| C | -0.120854 | -3.289350 | -2.864170 |
| H | 0.859231  | -3.672967 | -2.556955 |
| H | -0.389267 | -3.761903 | -3.815609 |
| H | -0.858922 | -3.588660 | -2.113499 |

## 6

|    |           |           |           |
|----|-----------|-----------|-----------|
| Zr | 0.879260  | -0.428835 | -0.038491 |
| C  | -0.534068 | -2.328885 | -2.735382 |
| N  | -1.011437 | 0.580342  | -0.394043 |
| O  | 0.099065  | -1.404567 | -2.237441 |
| C  | -0.818554 | -2.351276 | -4.219894 |
| N  | 1.968759  | 1.419560  | -1.389021 |
| H  | -0.458295 | -1.435663 | -4.689961 |
| O  | 2.524277  | -1.387674 | -0.753531 |
| H  | -0.324794 | -3.215805 | -4.679266 |
| O  | 0.243172  | -1.832220 | 1.165594  |
| H  | -1.892923 | -2.466042 | -4.402032 |
| N  | 1.721583  | 0.882630  | 1.375360  |
| C  | -1.055563 | -3.473809 | -1.904107 |
| H  | -0.718508 | -3.376307 | -0.872514 |
| H  | -2.151890 | -3.477820 | -1.931655 |
| H  | -0.725015 | -4.431044 | -2.322906 |
| N  | -1.766995 | 1.170913  | 2.631992  |
| C  | 1.028936  | 2.555664  | -1.591394 |
| H  | 1.526264  | 3.332054  | -2.188820 |
| H  | 0.820724  | 2.992600  | -0.611921 |
| C  | -2.173153 | 0.121764  | 0.365263  |
| H  | -1.943543 | -0.847252 | 0.816850  |
| H  | -3.035148 | -0.036829 | -0.317784 |
| C  | -1.379627 | 1.687504  | -1.254656 |
| H  | -1.668390 | 2.581100  | -0.664776 |
| H  | -2.284441 | 1.436455  | -1.845065 |
| C  | 3.078803  | 1.784686  | -0.461959 |
| H  | 3.595219  | 2.691551  | -0.807927 |
| H  | 3.784267  | 0.950794  | -0.492770 |
| C  | 4.718354  | 2.039865  | -3.342924 |
| H  | 5.222589  | 1.428642  | -2.599183 |
| C  | 3.332884  | 1.904577  | -3.519704 |
| C  | -0.298428 | 2.138220  | -2.241743 |
| H  | -0.693422 | 2.999441  | -2.795277 |
| H  | -0.128932 | 1.349484  | -2.982055 |
| C  | 2.531656  | 0.916605  | -2.689708 |
| H  | 3.138281  | 0.051093  | -2.422102 |
| H  | 1.695680  | 0.537300  | -3.279970 |
| C  | 2.596834  | 1.966885  | 0.976741  |
| H  | 3.498735  | 2.018233  | 1.616463  |
| H  | 2.114806  | 2.956522  | 1.082348  |
| C  | -2.417870 | 1.173411  | 3.955545  |
| H  | -1.630135 | 1.119759  | 4.714823  |

|          |           |           |           |          |           |           |           |
|----------|-----------|-----------|-----------|----------|-----------|-----------|-----------|
| H        | -2.991086 | 0.242646  | 4.036226  | H        | 1.729916  | -2.777867 | 2.182431  |
| C        | 2.716029  | 2.679371  | -4.513980 | C        | 0.273109  | -1.410389 | 3.084271  |
| H        | 1.648381  | 2.570284  | -4.688448 | H        | 0.070657  | -2.066983 | 3.943429  |
| C        | -3.332449 | 2.350673  | 4.279546  | H        | 0.293724  | -0.379297 | 3.446814  |
| C        | -0.819545 | 2.275222  | 2.424380  | N        | 1.453656  | -0.995847 | 0.143099  |
| H        | -1.284664 | 3.253857  | 2.640836  | C        | -2.086633 | -0.867723 | 2.760758  |
| H        | -0.563863 | 2.264352  | 1.364341  | H        | -1.821939 | 0.176974  | 2.927031  |
| C        | -4.701827 | 2.308235  | 3.978758  | H        | -2.878546 | -0.888246 | 2.007647  |
| H        | -5.124330 | 1.407804  | 3.539869  | C        | 1.955055  | -0.756614 | -4.279030 |
| C        | 1.351347  | 0.930189  | 2.785622  | C        | 3.230772  | -1.340196 | -4.245724 |
| H        | 2.261191  | 0.923975  | 3.415252  | H        | 3.723709  | -1.491667 | -3.289155 |
| H        | 0.796477  | 0.020893  | 3.029350  | C        | -2.158565 | -2.909153 | 0.560791  |
| C        | 3.118054  | -2.658732 | -0.792473 | H        | -2.057916 | -3.886027 | 0.054588  |
| H        | 2.394588  | -3.416172 | -0.436324 | H        | -3.184138 | -2.907523 | 0.977000  |
| C        | -2.825426 | 3.514616  | 4.876884  | C        | -2.616133 | -1.531769 | 6.494581  |
| H        | -1.772848 | 3.560628  | 5.145144  | H        | -2.268108 | -1.127623 | 7.441278  |
| C        | -0.058274 | -2.557669 | 2.338578  | C        | 0.785756  | 3.031508  | 4.021111  |
| H        | -0.582791 | -1.873876 | 3.024646  | C        | -1.820831 | 2.141534  | -1.855378 |
| C        | 0.489512  | 2.139572  | 3.211603  | H        | 0.562370  | 4.033116  | 3.631998  |
| H        | 1.054025  | 3.071547  | 3.078841  | H        | -1.665243 | 2.795188  | -0.981678 |
| H        | 0.300981  | 2.064159  | 4.291155  | C        | -3.529047 | -2.587941 | 6.477649  |
| C        | -2.703842 | 1.021039  | 1.510165  | H        | -3.891580 | -3.012866 | 7.409411  |
| H        | -3.036530 | 1.998642  | 1.121780  | C        | -1.795776 | -2.699523 | -2.683958 |
| H        | -3.608037 | 0.525868  | 1.883542  | H        | -1.404051 | -3.641456 | -2.280731 |
| C        | 5.459219  | 2.934458  | -4.116514 | H        | -2.429166 | -2.980936 | -3.537354 |
| H        | 6.531433  | 3.020672  | -3.963645 | C        | 2.117647  | -1.990780 | -0.678215 |
| C        | 1.230267  | -3.039315 | 3.011063  | H        | 2.427496  | -2.875051 | -0.093314 |
| H        | 1.773381  | -3.719247 | 2.345830  | H        | 3.056144  | -1.590682 | -1.108670 |
| H        | 1.007956  | -3.570572 | 3.943591  | C        | -2.659233 | -1.993736 | -1.623810 |
| H        | 1.883567  | -2.193765 | 3.242721  | H        | -2.971025 | -1.022970 | -2.024258 |
| C        | 3.511225  | -3.027087 | -2.229816 | H        | -3.581203 | -2.577272 | -1.466413 |
| H        | 3.922860  | -4.041904 | -2.283628 | C        | 2.015268  | -0.901385 | -6.712144 |
| H        | 4.269284  | -2.331891 | -2.609120 | H        | 1.539234  | -0.716698 | -7.671219 |
| H        | 2.641349  | -2.970127 | -2.891729 | C        | -0.229928 | 2.439998  | 1.817038  |
| C        | -3.652312 | 4.606606  | 5.146744  | C        | 1.185459  | -2.484897 | -1.785747 |
| H        | -3.237023 | 5.497088  | 5.610984  | H        | 1.751144  | -2.999437 | -2.577646 |
| C        | 4.826739  | 3.708821  | -5.090906 | H        | 0.483148  | -3.204718 | -1.360095 |
| H        | 5.402496  | 4.403344  | -5.696030 | C        | 2.137562  | -0.781547 | 1.419454  |
| C        | 3.451798  | 3.575641  | -5.290903 | H        | 1.969222  | 0.244308  | 1.764375  |
| H        | 2.952635  | 4.164527  | -6.055488 | H        | 3.226531  | -0.892856 | 1.285968  |
| C        | -5.534271 | 3.395569  | 4.247668  | C        | -1.120410 | -2.873976 | 1.683004  |
| H        | -6.593121 | 3.337430  | 4.009963  | H        | -1.423021 | -3.521870 | 2.519931  |
| C        | -5.010361 | 4.551770  | 4.829123  | H        | -0.172963 | -3.254941 | -1.295639 |
| H        | -5.656829 | 5.398729  | 5.041365  | C        | 3.277392  | -1.495801 | -6.659593 |
| C        | 4.331847  | -2.697419 | 0.144503  | H        | 3.786890  | -1.779863 | -7.575994 |
| H        | 4.801807  | -3.688146 | 0.153175  | C        | -3.329984 | 1.916175  | -2.006740 |
| H        | 4.029025  | -2.445581 | 1.164903  | C        | 2.299770  | 2.903953  | 4.204501  |
| H        | 5.078773  | -1.963400 | -0.179377 | H        | -3.537751 | 1.289781  | -2.881797 |
| C        | -0.998081 | -3.723171 | 2.016701  | H        | 2.551501  | 1.904199  | 4.573902  |
| H        | -1.907018 | -3.364142 | 1.524401  | H        | -3.860635 | 2.866836  | -2.133719 |
| H        | -1.290461 | -4.248596 | 2.932429  | H        | 2.672120  | 3.639906  | 4.925807  |
| H        | -0.503973 | -4.443541 | 1.354702  | H        | 2.821653  | 3.056329  | 3.255964  |
|          |           |           |           | H        | -3.733063 | 1.412328  | -1.122571 |
|          |           |           |           | C        | -3.982492 | -3.085381 | 5.255007  |
|          |           |           |           | H        | -4.704129 | -3.897340 | 5.231083  |
|          |           |           |           | C        | 3.885633  | -1.710101 | -5.421793 |
|          |           |           |           | H        | 4.874325  | -2.157818 | -5.370882 |
|          |           |           |           | C        | 0.030410  | 2.845227  | 5.338632  |
|          |           |           |           | C        | -1.233990 | 2.848807  | -3.082367 |
|          |           |           |           | H        | -0.159229 | 3.012570  | -2.954444 |
|          |           |           |           | H        | -1.047404 | 2.953333  | 5.187806  |
|          |           |           |           | H        | -1.712067 | 3.821374  | -3.246306 |
|          |           |           |           | H        | 0.350531  | 3.581236  | 6.084356  |
|          |           |           |           | H        | -1.383057 | 2.239578  | -3.981580 |
|          |           |           |           | H        | 0.221220  | 1.845531  | 5.743937  |
|          |           |           |           | C        | 0.793063  | 3.261430  | 1.013041  |
|          |           |           |           | H        | 1.698060  | 2.666483  | 0.865451  |
|          |           |           |           | H        | 1.062070  | 4.199081  | 1.509671  |
|          |           |           |           | H        | 0.375227  | 3.506352  | 0.032789  |
|          |           |           |           | C        | -1.535192 | 3.218158  | 2.059240  |
|          |           |           |           | H        | -1.990830 | 3.492845  | 1.104397  |
|          |           |           |           | H        | -1.367940 | 4.137079  | 2.630109  |
|          |           |           |           | H        | -2.236954 | 2.586123  | 2.609183  |
|          |           |           |           |          |           |           |           |
| <b>7</b> |           |           |           | <b>8</b> |           |           |           |
| Zr       | -0.514842 | -0.270375 | -0.143991 | Zr       | 0.796150  | -0.500503 | -0.092458 |
| N        | -0.871858 | -1.487691 | 2.131376  | N        | -1.626906 | 0.618847  | -0.783511 |
| N        | 0.384411  | -1.366455 | -2.325187 |          |           |           |           |
| O        | -1.154206 | 0.919212  | -1.638367 |          |           |           |           |
| O        | 0.338599  | 2.032463  | 3.094093  |          |           |           |           |
| O        | -0.504085 | 1.260806  | 1.161726  |          |           |           |           |
| C        | -2.588463 | -1.484057 | 4.057757  |          |           |           |           |
| C        | 1.365619  | -0.534370 | -5.533190 |          |           |           |           |
| H        | 0.390077  | -0.057716 | -5.585028 |          |           |           |           |
| C        | -3.518290 | -2.534837 | 4.059029  |          |           |           |           |
| H        | -3.894538 | -2.916680 | 3.113733  |          |           |           |           |
| C        | -0.673240 | -1.829612 | -3.264893 |          |           |           |           |
| H        | -0.205164 | -2.366898 | -4.102614 |          |           |           |           |
| H        | -1.127899 | -0.920730 | -3.671893 |          |           |           |           |
| C        | -2.155180 | -0.985680 | 5.296176  |          |           |           |           |
| H        | -1.457664 | -0.152739 | 5.316771  |          |           |           |           |
| N        | -1.964197 | -1.798296 | -0.352211 |          |           |           |           |
| C        | 1.241504  | -0.335517 | -3.003763 |          |           |           |           |
| H        | 1.969503  | 0.004335  | -2.263625 |          |           |           |           |
| H        | 0.575655  | 0.504306  | -3.206222 |          |           |           |           |
| C        | 1.665512  | -1.738430 | 2.528408  |          |           |           |           |
| H        | 2.352471  | -1.666609 | 3.383665  |          |           |           |           |

|   |           |           |           |          |           |           |           |
|---|-----------|-----------|-----------|----------|-----------|-----------|-----------|
| O | -0.272535 | -0.933461 | -1.831847 | C        | 4.798591  | 3.134805  | -5.419394 |
| N | 1.921309  | 1.274352  | -1.506279 | H        | 5.384947  | 3.756423  | -6.090037 |
| O | 2.421951  | -1.531826 | -0.504174 | C        | 3.424743  | 2.988796  | -5.618015 |
| O | 0.033356  | -1.680870 | 1.264927  | H        | 2.937201  | 3.493853  | -6.447289 |
| N | 1.485215  | 1.061055  | 1.193721  | C        | -5.534967 | 2.723089  | 4.845757  |
| C | -2.302797 | -0.409818 | -3.065858 | H        | -6.607402 | 2.567178  | 4.766622  |
| C | -2.359912 | -1.815852 | -1.036696 | C        | -5.034517 | 3.764533  | 5.627873  |
| N | -1.793265 | 1.650117  | 2.211232  | H        | -5.713820 | 4.426865  | 6.156943  |
| C | -1.625656 | -0.624372 | -1.692662 | C        | 4.625719  | -2.371861 | -0.016741 |
| C | 1.039954  | 2.433953  | -1.799736 | H        | 5.212751  | -3.278226 | 0.170060  |
| H | 1.594801  | 3.147813  | -2.424690 | H        | 4.681206  | -1.734609 | 0.871165  |
| H | 0.837864  | 2.936637  | -0.851967 | H        | 5.084038  | -1.835516 | -0.855685 |
| C | -2.815196 | 0.722409  | 0.100414  | C        | -0.343020 | -4.060350 | 1.483582  |
| H | -2.921911 | -0.222358 | 0.631101  | H        | -0.965250 | -4.057226 | 0.584935  |
| H | -3.728392 | 0.863778  | -0.507592 | H        | -0.717315 | -4.835866 | 2.161267  |
| C | -1.504742 | 1.883223  | -1.554094 | H        | 0.678449  | -4.324047 | 1.189256  |
| H | -1.486370 | 2.701507  | -0.831115 |          |           |           |           |
| H | -2.418020 | 2.032018  | -2.153211 |          |           |           |           |
| C | 3.020204  | 1.698969  | -0.598485 | <b>9</b> |           |           |           |
| H | 3.574378  | 2.551506  | -1.018147 | Zr       | -1.147084 | -0.768177 | 0.008188  |
| H | 3.702878  | 0.849030  | -0.521102 | C        | -4.578359 | -0.781288 | 0.080213  |
| C | 4.662273  | 1.663873  | -3.503954 | N        | -1.098257 | -0.479071 | 2.124952  |
| H | 5.155753  | 1.132076  | -2.694709 | O        | -3.514008 | -0.244219 | 0.388537  |
| C | 3.277736  | 1.517976  | -3.679855 | C        | -4.614567 | -2.098716 | -0.647295 |
| C | -0.292750 | 2.091192  | -2.479206 | N        | -0.836636 | 1.716751  | -0.229428 |
| H | -0.560607 | 2.952150  | -3.105596 | H        | -4.128440 | -2.868194 | -0.038712 |
| H | -0.163624 | 1.249077  | -3.156831 | O        | -1.970911 | -0.499850 | -1.898470 |
| C | 2.462330  | 0.633927  | -2.752737 | H        | -5.630508 | -2.415295 | -0.890397 |
| H | 3.060952  | -0.210085 | -2.406475 | O        | -1.305700 | -2.743311 | -0.049656 |
| H | 1.610074  | 0.206381  | -3.284639 | H        | -4.015780 | -1.999572 | -1.558656 |
| C | 2.480287  | 2.035217  | 0.793708  | N        | 0.864397  | -0.519390 | -0.491691 |
| H | 3.342276  | 2.039171  | 1.487785  | C        | -5.884686 | -0.113104 | 0.423321  |
| H | 2.099886  | 3.074586  | 0.809788  | H        | -5.713674 | 0.823654  | 0.954608  |
| C | -2.321322 | 1.133436  | 3.482974  | H        | -6.452599 | 0.075412  | -0.495738 |
| H | -1.469046 | 0.869725  | 4.116869  | N        | 1.386583  | -2.345133 | 2.636914  |
| H | -2.839152 | 0.192201  | 3.262309  | H        | -6.496382 | -0.785477 | 1.036384  |
| C | 2.675264  | 2.185396  | -4.756996 | C        | -0.438988 | 2.338717  | 1.065746  |
| H | 1.609176  | 2.062336  | -4.930817 | H        | -0.344868 | 3.423614  | 0.924174  |
| C | -3.267658 | 2.045233  | 4.256367  | H        | 0.555893  | 1.964947  | 1.320322  |
| C | -0.834237 | 2.753074  | 2.301520  | C        | -1.024462 | -1.681458 | 2.961619  |
| H | -1.285878 | 3.674021  | 2.716137  | H        | -1.305802 | -2.552156 | 2.363776  |
| H | -0.537106 | 2.985518  | 1.274807  | H        | -1.759858 | -1.606137 | 3.787320  |
| C | -4.657068 | 1.872543  | 4.170570  | C        | -1.091225 | 0.712351  | 2.955392  |
| H | -5.055668 | 1.050096  | 3.580557  | H        | -0.114349 | 0.842156  | 3.461908  |
| C | 1.157127  | 1.135097  | 2.611213  | H        | -1.827444 | 0.609659  | 3.775106  |
| H | 2.074034  | 1.029311  | 3.223179  | C        | 0.294982  | 1.759227  | -1.204400 |
| H | 0.518072  | 0.283327  | 2.851945  | H        | 0.693827  | 2.779511  | -1.289324 |
| C | 3.168016  | -2.716563 | -0.335952 | H        | -0.112830 | 1.475357  | -2.176904 |
| H | 2.753422  | -3.273547 | 0.520736  | C        | -1.525520 | 4.209401  | -2.498495 |
| C | -2.780964 | 3.087861  | 5.060640  | H        | -1.323574 | 3.431585  | -3.230125 |
| H | -1.708676 | 3.224264  | 5.170769  | C        | -1.917296 | 3.847401  | -1.200628 |
| C | -0.361151 | -2.688482 | 2.167397  | C        | -1.396191 | 2.021290  | 2.221881  |
| H | -1.397214 | -2.472808 | 2.479259  | H        | -1.324154 | 2.835000  | 2.954388  |
| H | -1.792049 | 0.315906  | -3.697103 | H        | -2.434829 | 2.014081  | 1.874474  |
| H | -3.348302 | -0.099736 | -2.955127 | C        | -2.053409 | 2.385065  | -0.815666 |
| H | -2.292993 | -1.364948 | -3.597483 | H        | -2.325035 | 1.790855  | -1.688258 |
| H | -2.002918 | -2.000885 | -0.023817 | H        | -2.861947 | 2.267257  | -0.092469 |
| C | 0.443138  | 2.421487  | 3.078808  | C        | 1.410375  | 0.780434  | -0.835974 |
| H | 1.110760  | 3.288194  | 2.988925  | H        | 2.086052  | 0.715220  | -1.708474 |
| H | 0.239621  | 2.323700  | 4.153975  | H        | 2.027442  | 1.202887  | -0.022948 |
| H | -2.121423 | -2.694997 | -1.640471 | C        | 2.184027  | -3.534965 | 2.982375  |
| H | -3.447698 | -1.695501 | -1.024067 | H        | 2.812232  | -3.778925 | 2.119213  |
| C | -2.805666 | 1.829436  | 1.170344  | H        | 1.484666  | -4.370440 | 3.098733  |
| H | -2.703042 | 2.820964  | 0.717286  | C        | -2.220566 | 4.870872  | -0.289660 |
| H | -3.814776 | 1.833705  | 1.604244  | H        | -2.560469 | 4.613859  | 0.710677  |
| C | 5.416658  | 2.465831  | -4.361167 | C        | 3.062852  | -3.441078 | 4.225312  |
| H | 6.488050  | 2.561212  | -4.208048 | C        | 2.167801  | -1.176306 | 2.222082  |
| C | 0.527820  | -2.673230 | 3.414697  | H        | 2.917686  | -0.890698 | 2.982875  |
| H | 1.568938  | -2.871627 | 3.138015  | C        | -0.527288 | -0.821079 | -3.795773 |
| H | 0.206722  | -3.440085 | 4.128373  | C        | -1.808969 | -5.039604 | 0.334613  |
| H | 0.487294  | -1.701486 | 3.913465  | H        | 1.461292  | -0.348089 | 2.142441  |
| C | 3.041623  | -3.593067 | -1.585256 | H        | 0.273372  | -1.144739 | -3.137431 |
| H | 3.573722  | -4.542507 | -1.455880 | C        | 2.591151  | -3.864497 | 5.476637  |
| H | 3.462508  | -3.078652 | -2.456436 | H        | -1.954495 | -4.821990 | 1.388388  |
| H | 1.989322  | -3.806438 | -1.793510 | H        | 1.598659  | -4.302252 | 5.552470  |
| C | -3.653432 | 3.941220  | 5.736966  | C        | 1.878390  | -1.558822 | -0.315183 |
| H | -3.254749 | 4.739932  | 6.356541  | C        | -1.761833 | -0.450456 | -3.218767 |

|           |           |           |           |
|-----------|-----------|-----------|-----------|
| C         | -1.449574 | -3.993316 | -0.531824 |
| H         | 2.475211  | -1.659931 | -1.239949 |
| H         | 1.368437  | -2.514350 | -0.161258 |
| C         | 4.362309  | -2.915797 | 4.154945  |
| H         | 4.763270  | -2.610194 | 3.191804  |
| C         | 2.854484  | -1.334687 | 0.859509  |
| H         | 3.457929  | -0.434677 | 0.684738  |
| C         | -2.793665 | -0.014550 | -4.077141 |
| C         | -1.251426 | -4.265121 | -1.896645 |
| H         | 3.570431  | -2.167074 | 0.869921  |
| H         | -3.745179 | 0.273421  | -3.637777 |
| H         | -0.980664 | -3.451993 | -2.562763 |
| C         | 0.339968  | -2.015444 | 3.611364  |
| H         | 0.658845  | -1.210560 | 4.294342  |
| H         | 0.165733  | -2.890106 | 4.247794  |
| C         | -1.413657 | 5.550627  | -2.866772 |
| H         | -1.111044 | 5.808674  | -3.877709 |
| C         | -2.598812 | 0.040771  | -5.456515 |
| C         | -1.409856 | -5.564755 | -2.370637 |
| H         | -1.253572 | -5.763172 | -3.433119 |
| H         | -3.410698 | 0.377416  | -6.096763 |
| C         | 5.155159  | -2.797135 | 5.297763  |
| H         | 6.159174  | -2.388911 | 5.218671  |
| C         | -1.965237 | -6.334321 | -0.159658 |
| C         | -1.700838 | 6.557469  | -1.942992 |
| C         | -0.345690 | -0.760579 | -5.177348 |
| H         | 0.612457  | -1.053418 | -5.600162 |
| H         | -1.617424 | 7.601944  | -2.229475 |
| H         | -2.241210 | -7.135454 | 0.521136  |
| C         | -2.110389 | 6.214001  | -0.653647 |
| C         | -1.375223 | -0.331609 | -6.019303 |
| C         | -1.767034 | -6.606121 | -1.515307 |
| H         | -1.888287 | -7.615853 | -1.895985 |
| H         | -1.227007 | -0.288984 | -7.094158 |
| H         | -2.351408 | 6.990571  | 0.066916  |
| C         | 3.379778  | -3.751047 | 6.622531  |
| H         | 2.994210  | -4.091025 | 7.579984  |
| C         | 4.664326  | -3.211109 | 6.537258  |
| H         | 5.281387  | -3.123576 | 7.427110  |
| <b>10</b> |           |           |           |
| Zr        | 0.023443  | 0.917275  | -1.416095 |
| N         | 0.175338  | 3.230286  | -0.254799 |
| N         | 1.913204  | -0.781548 | -1.717441 |
| O         | -1.012615 | -0.771477 | -1.690211 |
| C         | 2.772937  | -2.413565 | -3.525170 |
| C         | 0.429316  | 4.378740  | -1.170692 |
| H         | 0.586542  | 5.289340  | -0.574883 |
| H         | -0.494827 | 4.518535  | -1.741027 |
| N         | 1.557829  | 1.764507  | -2.591878 |
| C         | 1.709449  | -1.430276 | -3.061888 |
| H         | 1.603625  | -0.620786 | -3.788643 |
| H         | 0.750294  | -1.943389 | -2.992031 |
| C         | -0.887874 | 4.692485  | 2.670881  |
| H         | -0.497972 | 3.782926  | 3.119854  |
| C         | -1.262264 | 4.689601  | 1.318626  |
| O         | -1.511457 | 2.012525  | -2.196019 |
| O         | -1.117626 | -3.017069 | -1.764878 |
| C         | 1.982237  | -1.842228 | -0.667407 |
| H         | 2.890671  | -2.440753 | -0.825226 |
| H         | 1.121374  | -2.493474 | -0.842088 |
| C         | 3.107103  | 0.092375  | -1.698089 |
| H         | 3.208052  | 0.468081  | -0.677831 |
| H         | 4.021498  | -0.469750 | -1.938880 |
| C         | -1.130649 | 3.440351  | 0.461502  |
| H         | -1.302403 | 2.549591  | 1.070964  |
| H         | -1.892618 | 3.447009  | -0.319300 |
| C         | 2.925426  | 1.280058  | -2.645280 |
| H         | 3.653991  | 2.054325  | -2.345499 |
| H         | 3.207465  | 1.003704  | -3.678608 |
| C         | 1.943675  | -1.379703 | 0.795201  |
| H         | 2.810733  | -0.755327 | 1.044782  |
| H         | 2.047860  | -2.291241 | 1.400143  |
| N         | 0.536249  | 0.683741  | 0.612432  |
| C         | 3.904577  | -1.993694 | -4.240513 |
| H         | 4.028426  | -0.940175 | -4.476659 |

|           |           |           |           |
|-----------|-----------|-----------|-----------|
| C         | -1.948534 | 7.015750  | 1.561611  |
| H         | -2.374670 | 7.914644  | 1.124888  |
| C         | -1.805233 | 5.867358  | 0.782244  |
| H         | -2.131062 | 5.879276  | -0.254675 |
| C         | -1.028477 | 5.838618  | 3.455258  |
| H         | -0.734674 | 5.816037  | 4.501012  |
| C         | -1.574786 | -4.880811 | -3.218502 |
| C         | -2.546843 | 2.156336  | -4.346817 |
| H         | -1.568237 | 2.140754  | -4.817888 |
| H         | -1.090032 | -4.350764 | -4.031716 |
| C         | 4.864739  | -2.910326 | -4.672721 |
| H         | 5.732163  | -2.562340 | -5.226858 |
| C         | -2.622273 | 2.077827  | -2.942280 |
| C         | -1.684987 | -4.255253 | -1.969246 |
| C         | 3.575430  | -4.707076 | -3.709140 |
| H         | 3.433879  | -5.765490 | -3.508710 |
| C         | -1.555563 | 7.006110  | 2.901187  |
| H         | -1.669712 | 7.897757  | 3.511019  |
| C         | 4.705235  | -4.270556 | -4.403665 |
| C         | -1.911102 | -1.771534 | -1.951921 |
| H         | 5.449616  | -4.985740 | -4.742132 |
| C         | 2.619056  | -3.786944 | -3.278016 |
| H         | 1.732695  | -4.136030 | -2.755075 |
| C         | 1.405108  | 3.092802  | -3.185188 |
| H         | 0.408796  | 3.186254  | -3.633212 |
| H         | 2.128398  | 3.225856  | -4.005812 |
| C         | -3.893548 | 2.093380  | -2.334942 |
| C         | -2.280271 | -4.943363 | -0.903601 |
| H         | -3.955634 | 2.033170  | -1.252045 |
| H         | -2.333423 | -4.463289 | 0.067821  |
| C         | 0.645466  | -0.656430 | 1.191584  |
| H         | -0.202619 | -1.270202 | 0.866249  |
| H         | 0.584382  | -0.597400 | 2.290277  |
| C         | 1.100342  | 1.711630  | 1.467498  |
| H         | 2.085033  | 1.421462  | 1.874932  |
| H         | 0.460736  | 1.880912  | 2.354162  |
| C         | 1.585330  | 4.233657  | -2.169384 |
| H         | 2.548130  | 4.127621  | -1.654634 |
| H         | 1.638458  | 5.190670  | -2.707262 |
| C         | 1.295615  | 3.012771  | 0.686090  |
| H         | 1.422782  | 3.866710  | 1.368343  |
| H         | 2.204722  | 2.931532  | 0.086314  |
| C         | -5.047858 | 2.183629  | -3.112725 |
| C         | -2.778626 | -6.232685 | -1.094592 |
| H         | -6.019052 | 2.192373  | -2.624238 |
| H         | -3.237998 | -6.758271 | -0.261898 |
| C         | -3.708172 | 2.248576  | -5.112897 |
| C         | -2.074087 | -6.171027 | -3.401628 |
| H         | -3.627742 | 2.307446  | -6.195506 |
| H         | -1.983439 | -6.647360 | -4.374013 |
| C         | -4.966522 | 2.262828  | -4.505105 |
| C         | -2.681813 | -6.850104 | -2.343565 |
| H         | -3.068373 | -7.854551 | -2.488595 |
| H         | -5.867760 | 2.333646  | -5.106464 |
| C         | -2.413818 | -1.693643 | -3.396132 |
| H         | -1.565802 | -1.718630 | -4.085854 |
| H         | -2.950405 | -0.753401 | -3.541070 |
| H         | -3.087564 | -2.521744 | -3.632408 |
| C         | -3.060721 | -1.735307 | -0.940472 |
| H         | -3.756646 | -2.566050 | -1.085236 |
| H         | -3.608887 | -0.797348 | -1.064171 |
| H         | -2.658851 | -1.777222 | 0.075373  |
| <b>11</b> |           |           |           |
| Zr        | -1.227988 | -0.943180 | -0.345413 |
| N         | -1.655868 | -0.678574 | 2.231164  |
| O         | -3.091179 | -0.451611 | 0.445502  |
| N         | -0.933676 | 1.554021  | -0.555481 |
| O         | -1.789740 | -0.845661 | -2.247206 |
| O         | -1.109377 | -2.923229 | -0.225876 |
| N         | 0.846445  | -0.522398 | -0.450148 |
| C         | -4.155177 | -0.074078 | 2.608763  |
| C         | -3.568109 | -2.347807 | 1.842996  |
| N         | 1.192013  | -2.067430 | 2.623130  |
| C         | -3.124758 | -0.869121 | 1.778068  |
| C         | -0.665459 | 2.204951  | 0.753697  |
| H         | -0.596988 | 3.290417  | 0.599352  |



|   |           |           |           |   |           |           |           |
|---|-----------|-----------|-----------|---|-----------|-----------|-----------|
| H | 0.319257  | 1.872093  | 1.088812  | H | -1.888202 | -7.841123 | -1.873536 |
| C | -1.214021 | -1.658054 | 3.262313  | H | -1.579923 | -0.598294 | -7.478673 |
| H | -1.424062 | -2.657275 | 2.883708  | H | -3.108369 | 6.606213  | -0.191307 |
| H | -1.811077 | -1.518348 | 4.181183  | C | 2.900552  | -4.462659 | 6.282461  |
| C | -1.406521 | 0.694328  | 2.752029  | H | 2.480412  | -4.887349 | 7.190040  |
| H | -0.349873 | 0.747918  | 3.021234  | C | 4.257208  | -4.142152 | 6.221954  |
| H | -1.965217 | 0.824619  | 3.691771  | H | 4.898022  | -4.310263 | 7.082797  |
| C | 0.279034  | 1.645901  | -1.412751 |   |           |           |           |
| H | 0.619375  | 2.687189  | -1.508788 |   |           |           |           |
| H | -0.006010 | 1.288603  | -2.406269 |   |           |           |           |
| C | -1.542563 | 4.121987  | -2.715711 |   |           |           |           |
| H | -1.128890 | 3.426558  | -3.441177 |   |           |           |           |
| C | -2.108206 | 3.626237  | -1.531045 |   |           |           |           |
| C | -1.691552 | 1.911002  | 1.854019  |   |           |           |           |
| H | -1.678297 | 2.772239  | 2.534620  |   |           |           |           |
| H | -2.693927 | 1.871212  | 1.431152  |   |           |           |           |
| C | -2.137387 | 2.134874  | -1.247280 |   |           |           |           |
| H | -2.240350 | 1.582133  | -2.182441 |   |           |           |           |
| H | -3.005959 | 1.875861  | -0.638989 |   |           |           |           |
| C | 1.395632  | 0.754349  | -0.866758 |   |           |           |           |
| H | 2.138152  | 0.622012  | -1.674184 |   |           |           |           |
| H | 1.942593  | 1.274408  | -0.058738 |   |           |           |           |
| C | 1.684550  | -3.444546 | 2.790842  |   |           |           |           |
| H | 2.197775  | -3.732788 | 1.868071  |   |           |           |           |
| H | 0.805975  | -4.095626 | 2.867949  |   |           |           |           |
| C | -2.675970 | 4.543444  | -0.633886 |   |           |           |           |
| H | -3.149277 | 4.178737  | 0.274439  |   |           |           |           |
| C | 2.595885  | -3.706684 | 3.984238  |   |           |           |           |
| C | 2.190913  | -1.064491 | 2.249149  |   |           |           |           |
| H | 2.973397  | -0.935861 | 3.020013  |   |           |           |           |
| C | -0.519861 | -1.038790 | -4.267730 |   |           |           |           |
| C | -0.646484 | -5.254601 | -0.033029 |   |           |           |           |
| H | 1.660743  | -0.109704 | 2.181810  |   |           |           |           |
| H | 0.364444  | -1.288818 | -3.689374 |   |           |           |           |
| C | 2.081897  | -4.248508 | 5.171733  |   |           |           |           |
| H | 0.030152  | -5.041851 | 0.788144  |   |           |           |           |
| H | 1.030780  | -4.524329 | 5.220347  |   |           |           |           |
| C | 1.868113  | -1.552971 | -0.269610 |   |           |           |           |
| C | -1.727211 | -0.794213 | -3.588985 |   |           |           |           |
| C | -1.310068 | -4.186455 | -0.657211 |   |           |           |           |
| H | 2.463587  | -1.657922 | -1.195142 |   |           |           |           |
| H | 1.363630  | -2.509146 | -0.111062 |   |           |           |           |
| C | 3.966128  | -3.405841 | 3.934959  |   |           |           |           |
| H | 4.397236  | -3.017971 | 3.016059  |   |           |           |           |
| H | -4.044055 | 1.006528  | 2.534833  |   |           |           |           |
| H | -4.119293 | -0.357185 | 3.666719  |   |           |           |           |
| H | -5.150093 | -0.323984 | 2.231482  |   |           |           |           |
| H | -2.866636 | -3.011711 | 1.338138  |   |           |           |           |
| C | 2.856393  | -1.316539 | 0.891536  |   |           |           |           |
| H | 3.498726  | -0.452101 | 0.679459  |   |           |           |           |
| C | -2.881004 | -0.482104 | -4.329309 |   |           |           |           |
| C | -2.186792 | -4.447593 | -1.724089 |   |           |           |           |
| H | 3.535414  | -2.178446 | 0.937146  |   |           |           |           |
| H | -3.809558 | -0.304521 | -3.795191 |   |           |           |           |
| H | -4.519295 | -2.405022 | 1.308369  |   |           |           |           |
| H | -2.691831 | -3.614560 | -2.202713 |   |           |           |           |
| H | -3.731395 | -2.701323 | 2.865772  |   |           |           |           |
| C | 0.269362  | -1.634729 | 3.673635  |   |           |           |           |
| H | 0.564804  | -0.649421 | 4.048095  |   |           |           |           |
| H | 0.343763  | -2.289899 | 4.551935  |   |           |           |           |
| C | -1.523222 | 5.491101  | -2.984578 |   |           |           |           |
| H | -1.083729 | 5.853050  | -3.909787 |   |           |           |           |
| C | -2.820851 | -0.412028 | -5.720618 |   |           |           |           |
| C | -2.387493 | -5.758158 | -2.154058 |   |           |           |           |
| H | -3.065869 | -5.948039 | -2.981681 |   |           |           |           |
| H | -3.720228 | -0.170624 | -6.281174 |   |           |           |           |
| C | 4.788857  | -3.617439 | 5.041940  |   |           |           |           |
| H | 5.847571  | -3.380823 | 4.980490  |   |           |           |           |
| C | -0.856913 | -6.561277 | -0.473337 |   |           |           |           |
| C | -2.078194 | 6.391967  | -2.073618 |   |           |           |           |
| C | -0.475094 | -0.966464 | -5.659553 |   |           |           |           |
| H | 0.463009  | -1.161206 | -6.172985 |   |           |           |           |
| H | -2.067643 | 7.457635  | -2.283747 |   |           |           |           |
| H | -0.336335 | -7.379745 | 0.017261  |   |           |           |           |
| C | -2.659949 | 5.913921  | -0.898410 |   |           |           |           |
| C | -1.620824 | -0.651684 | -6.394904 |   |           |           |           |
| C | -1.726908 | -6.822359 | -1.533978 |   |           |           |           |
